# Supplementary figures and images for: CryoEM structures of the human CLC-2 voltage-gated chloride channel reveal a ball-and-chain gating mechanism
Source: eLife journal article supplement (doi:10.7554/elife.90648), 2023-09-21

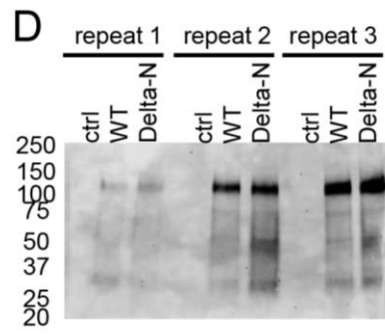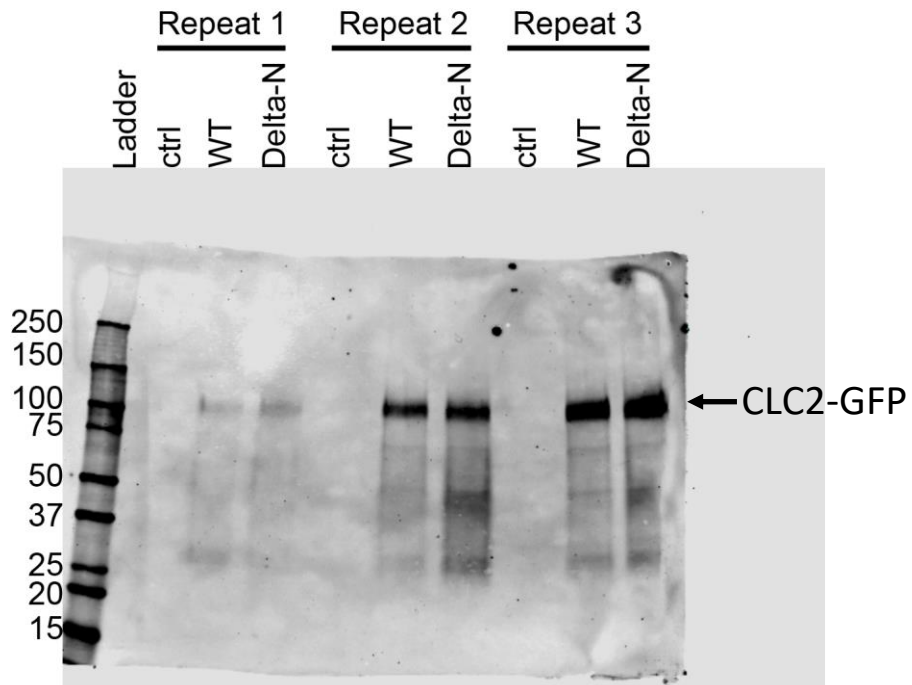

Supplement: fig6-data2 [file elife-90648-fig6-data2-v1.zip]
